# Supplementary material for: Selenium, Sulfur, and Methyl Jasmonate Treatments Improve the Accumulation of Lutein and Glucosinolates in Kale Sprouts
Source: MDPI journal article supplement (doi:10.3390/plants11091271), 2022-05-09

*Supplementary Materials*

# **Selenium, Sulfur, and Methyl Jasmonate Treatments Improve the Accumulation of Lutein and Glucosinolates in Kale Sprouts**

**Erika Ortega-Hernández <sup>1</sup>, Marilena Antunes-Ricardo <sup>1\*</sup>, Luis Cisneros-Zevallos <sup>2</sup> and Daniel A. Jacobo-Velázquez <sup>3\*</sup>**

<sup>1</sup> Tecnológico de Monterrey, The Institute for Obesity Research, Ave. Eugenio Garza Sada 2501, Monterrey, N.L., México, 64849; erika.orhe@gmail.com (E.O.-H.)

<sup>2</sup> Department of Horticultural Sciences, Texas A&M University, College Station, TX 77843, USA. lcisnero@tamu.edu (L.C.Z.)

<sup>3</sup> Tecnológico de Monterrey, The Institute for Obesity Research, Ave. General Ramón Corona 2514, Zapopan, Jal, México, 45201

\* Correspondence: marilena.antunes@tec.mx (M.A.-R.); djacobov@tec.mx (D.A.J.-V.).

**Figure S1.** Seed germination of Red Russian and Dwarf Green kale (*Brassica oleracea* var. *acephala*) treated with methyl jasmonate, selenium, sulfur or water as control for 7 days

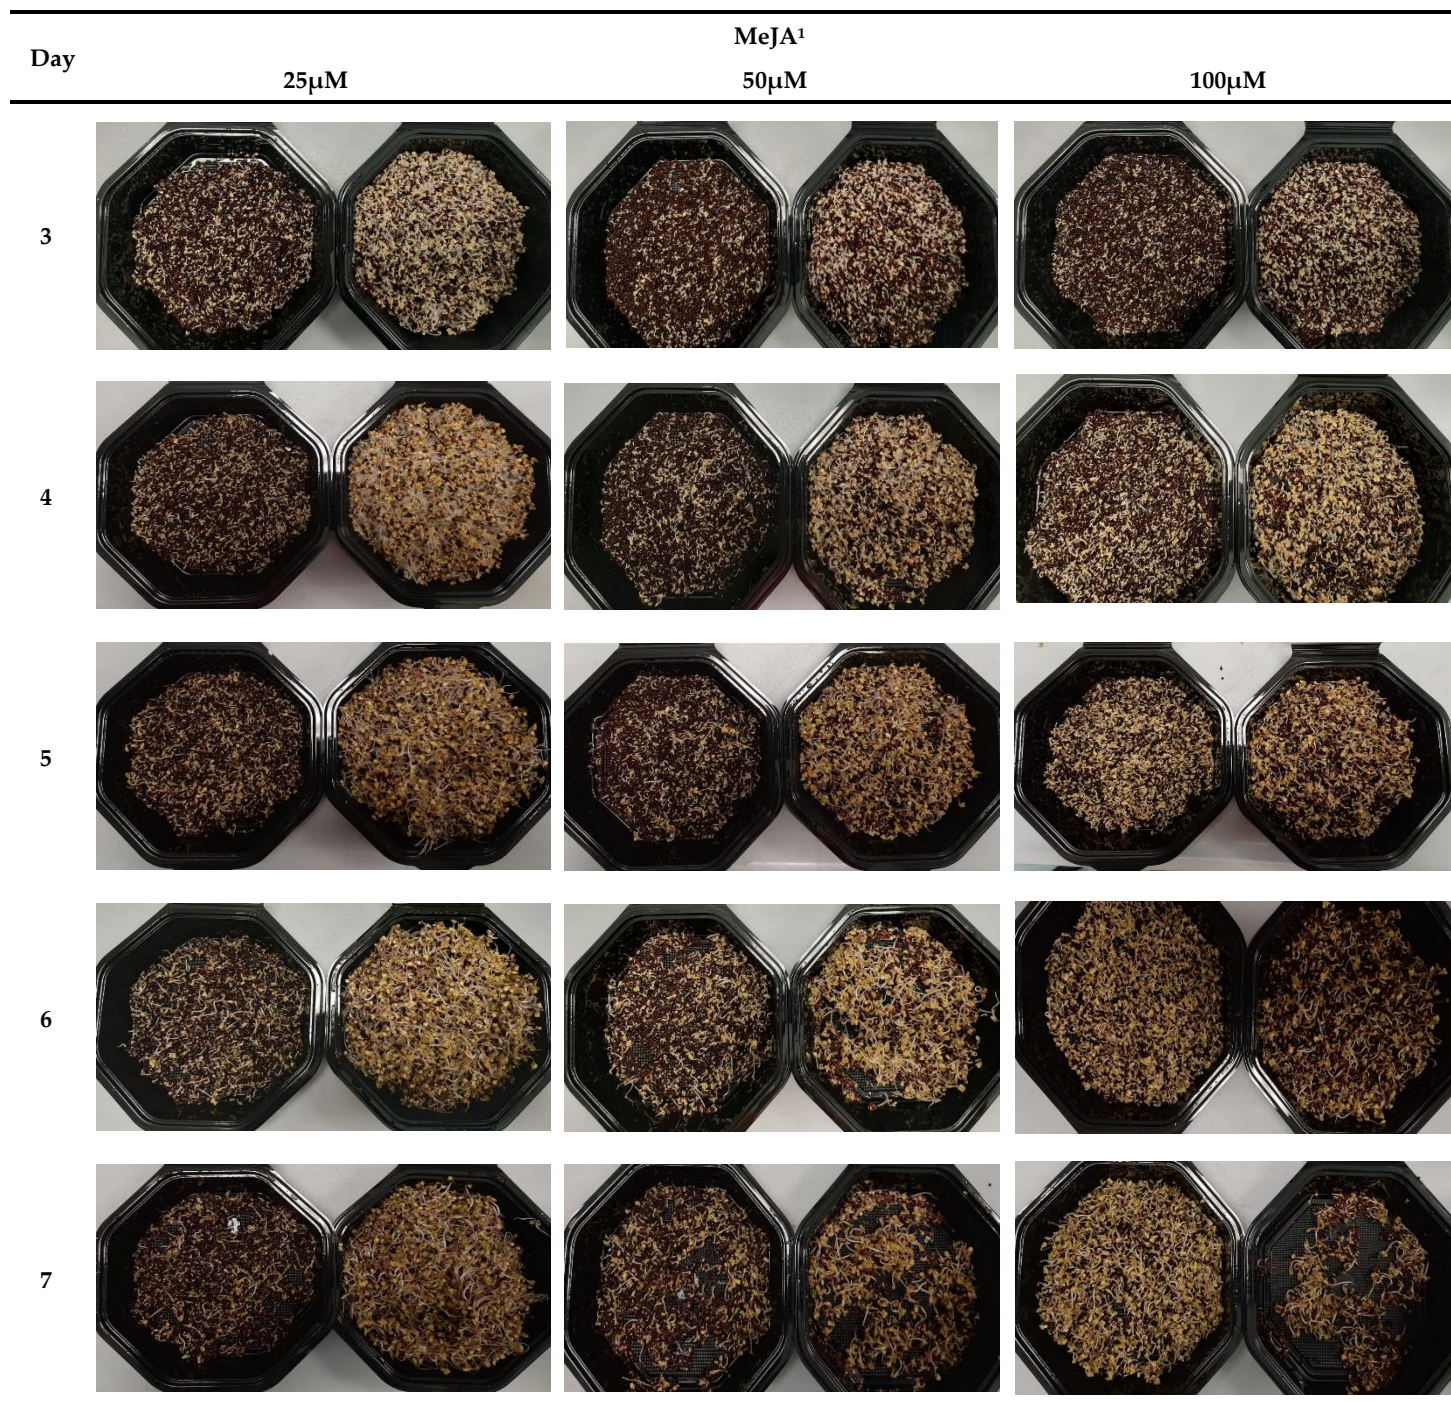

<sup>1</sup>The tray on the left side belongs to the Dwarf Green kale, while the tray on the right side is the Red Russian kale.



**Figure S1. (Continuation)** Seed germination of Red Russian and Dwarf Green kale (*Brassica oleracea* var. *acephala*) treated with methyl jasmonate, selenium, sulfur or water as control for 7 days

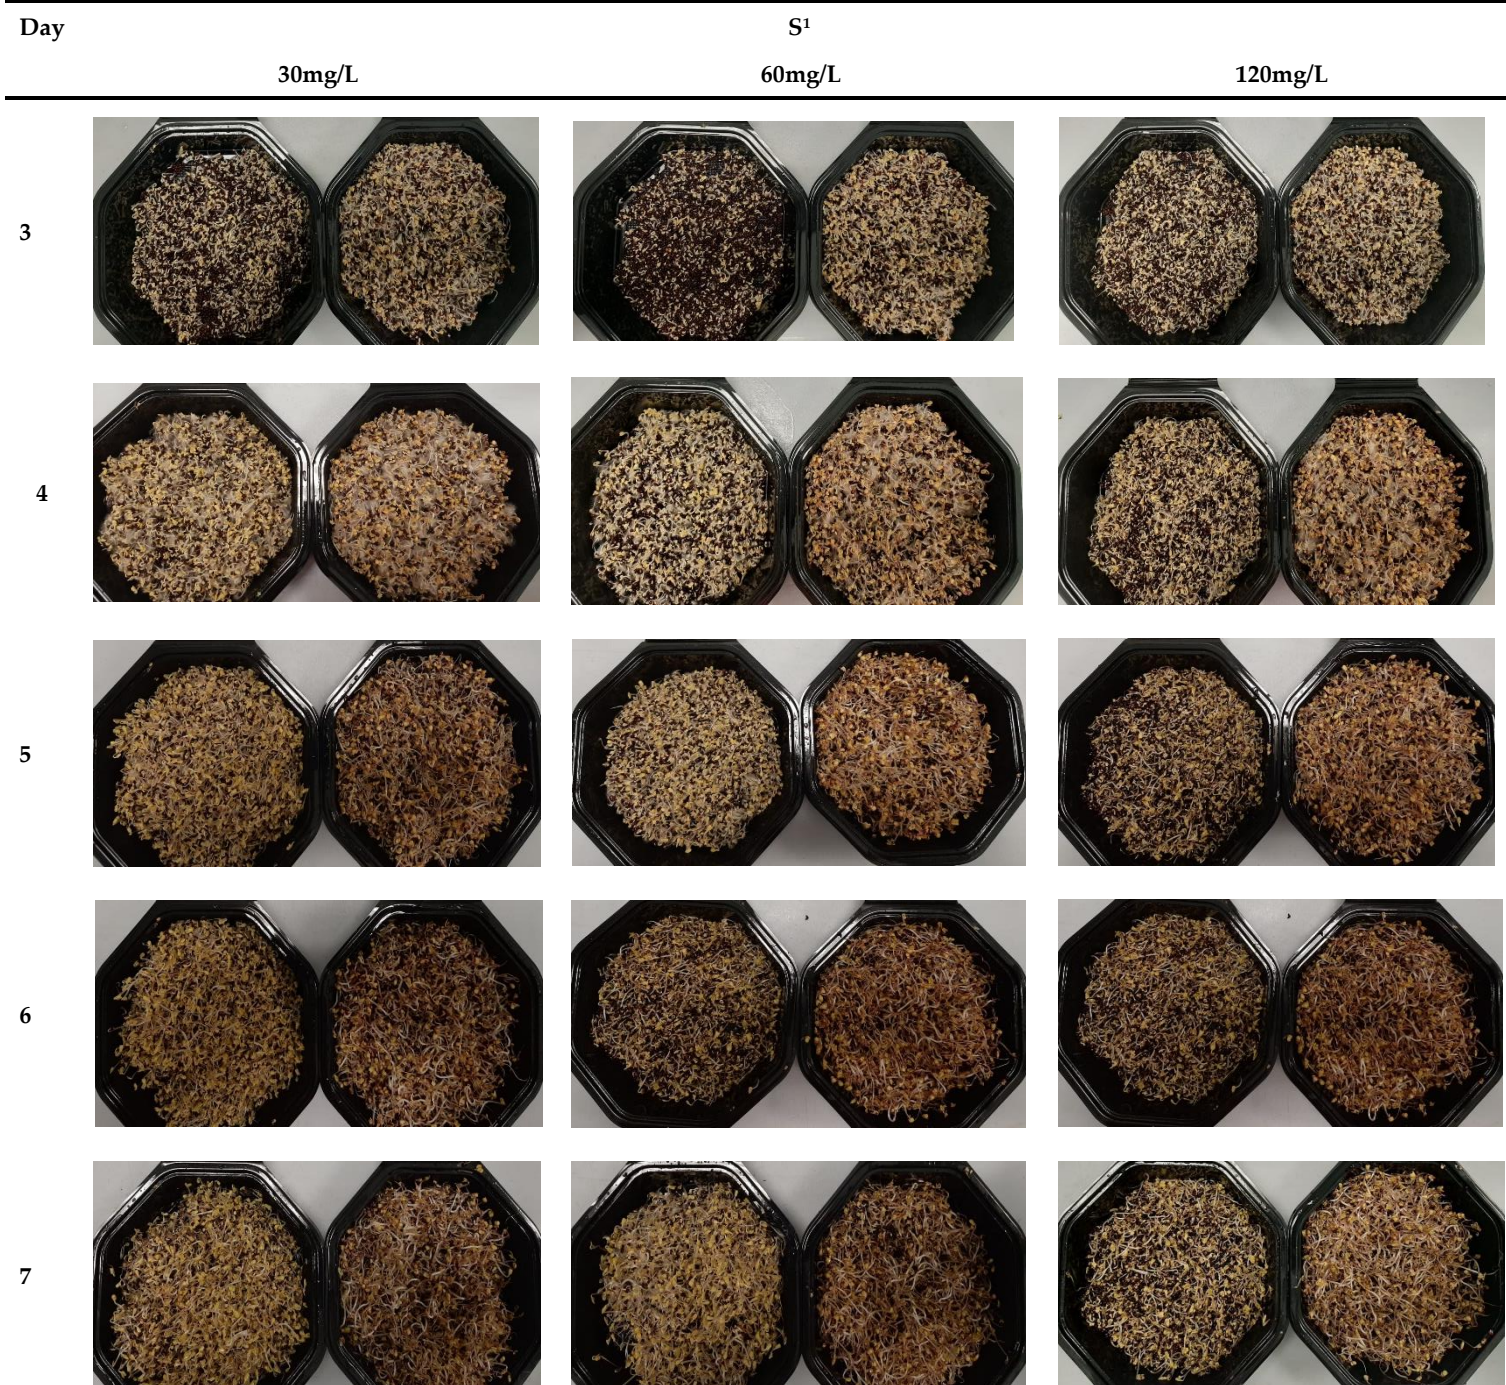

<sup>1</sup>The tray on the left side belongs to the Dwarf Green kale, while the tray on the right side is the Red Russian kale.



**Figure S1. (Continuation)** Seed germination of Red Russian and Dwarf Green kale (*Brassica oleracea* var. *acephala*) treated with methyl jasmonate, selenium, sulfur or water as control for 7 days

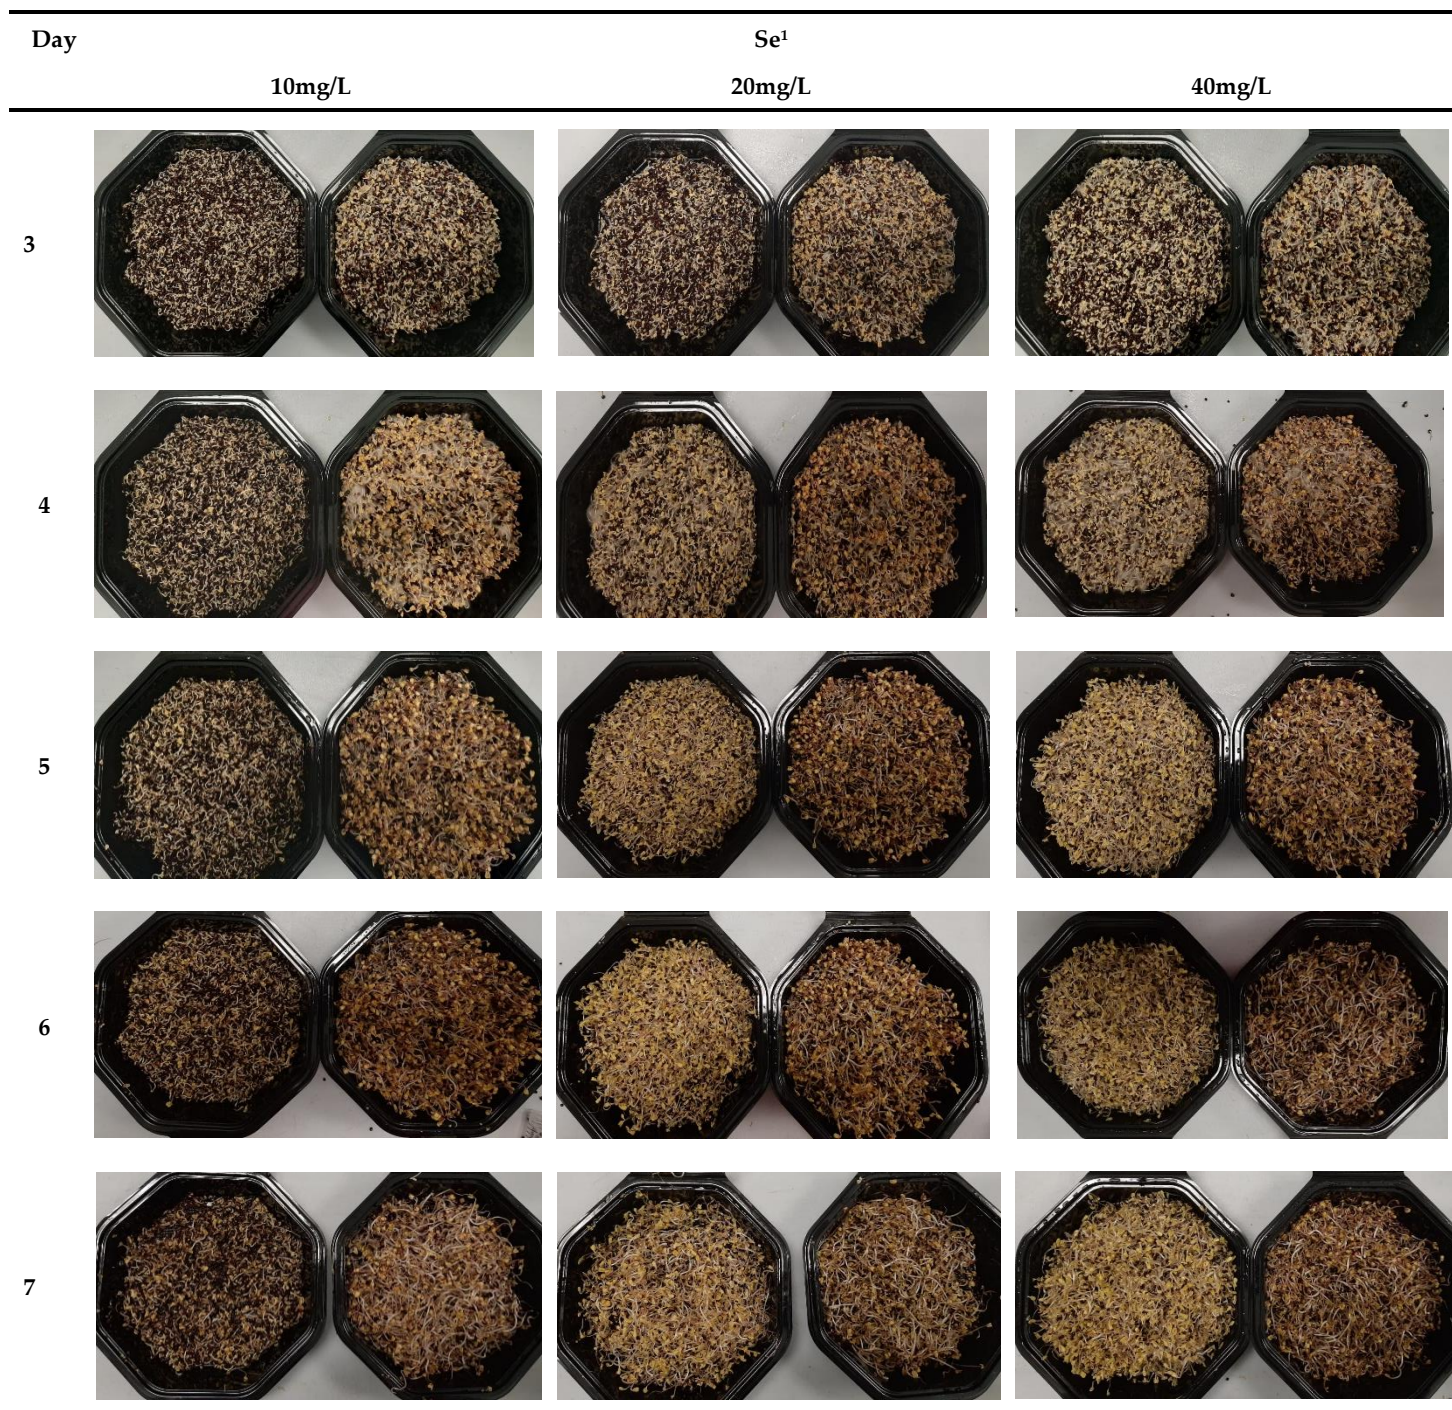

<sup>1</sup>The tray on the left side belongs to the Dwarf Green kale, while the tray on the right side is the Red Russian kale.



**Figure S1. (Continuation)** Seed germination of Red Russian and Dwarf Green kale (*Brassica oleracea* var. *acephala*) treated with methyl jasmonate, selenium, sulfur or water as control for 7 days

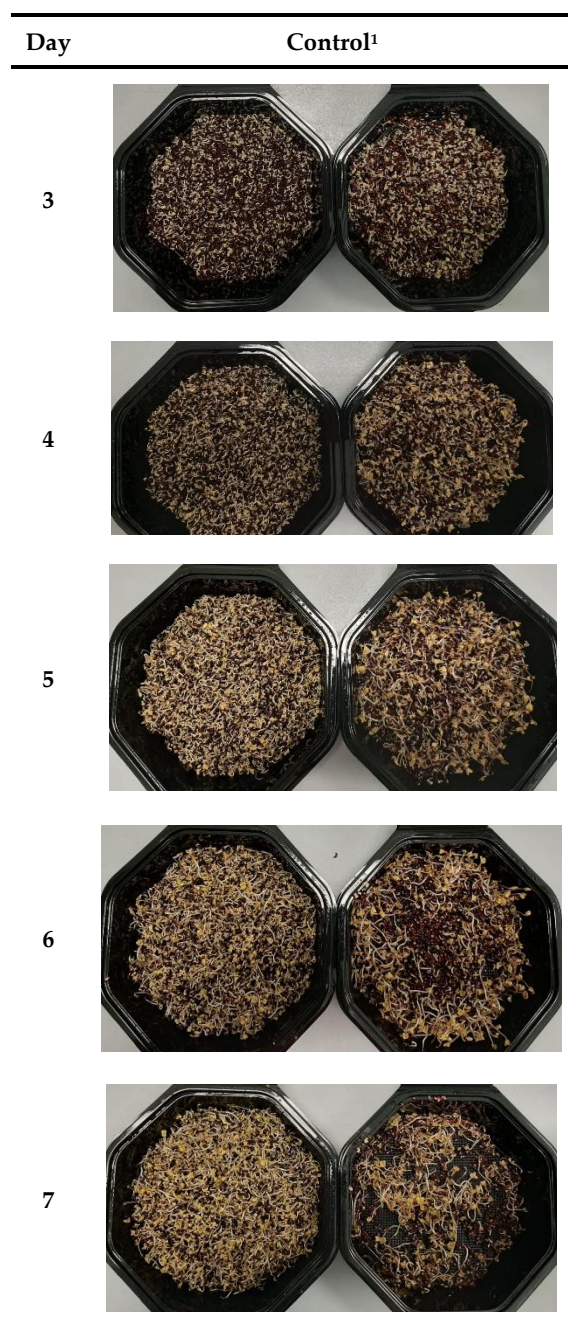

<sup>1</sup> The tray on the left side belongs to the Dwarf Green kale, while the tray on the right side is the Red Russian kale.

**Figure S2.** Comparison of Red Russian (left) and Dwarf Green kale (right) sprouts (*Brassica oleracea* var. *acephala*) germinated with most significant treatments: methyl jasmonate 25  $\mu$ M, selenium 40 mg/mL and sulfur 120 mg/mL after 7 days.

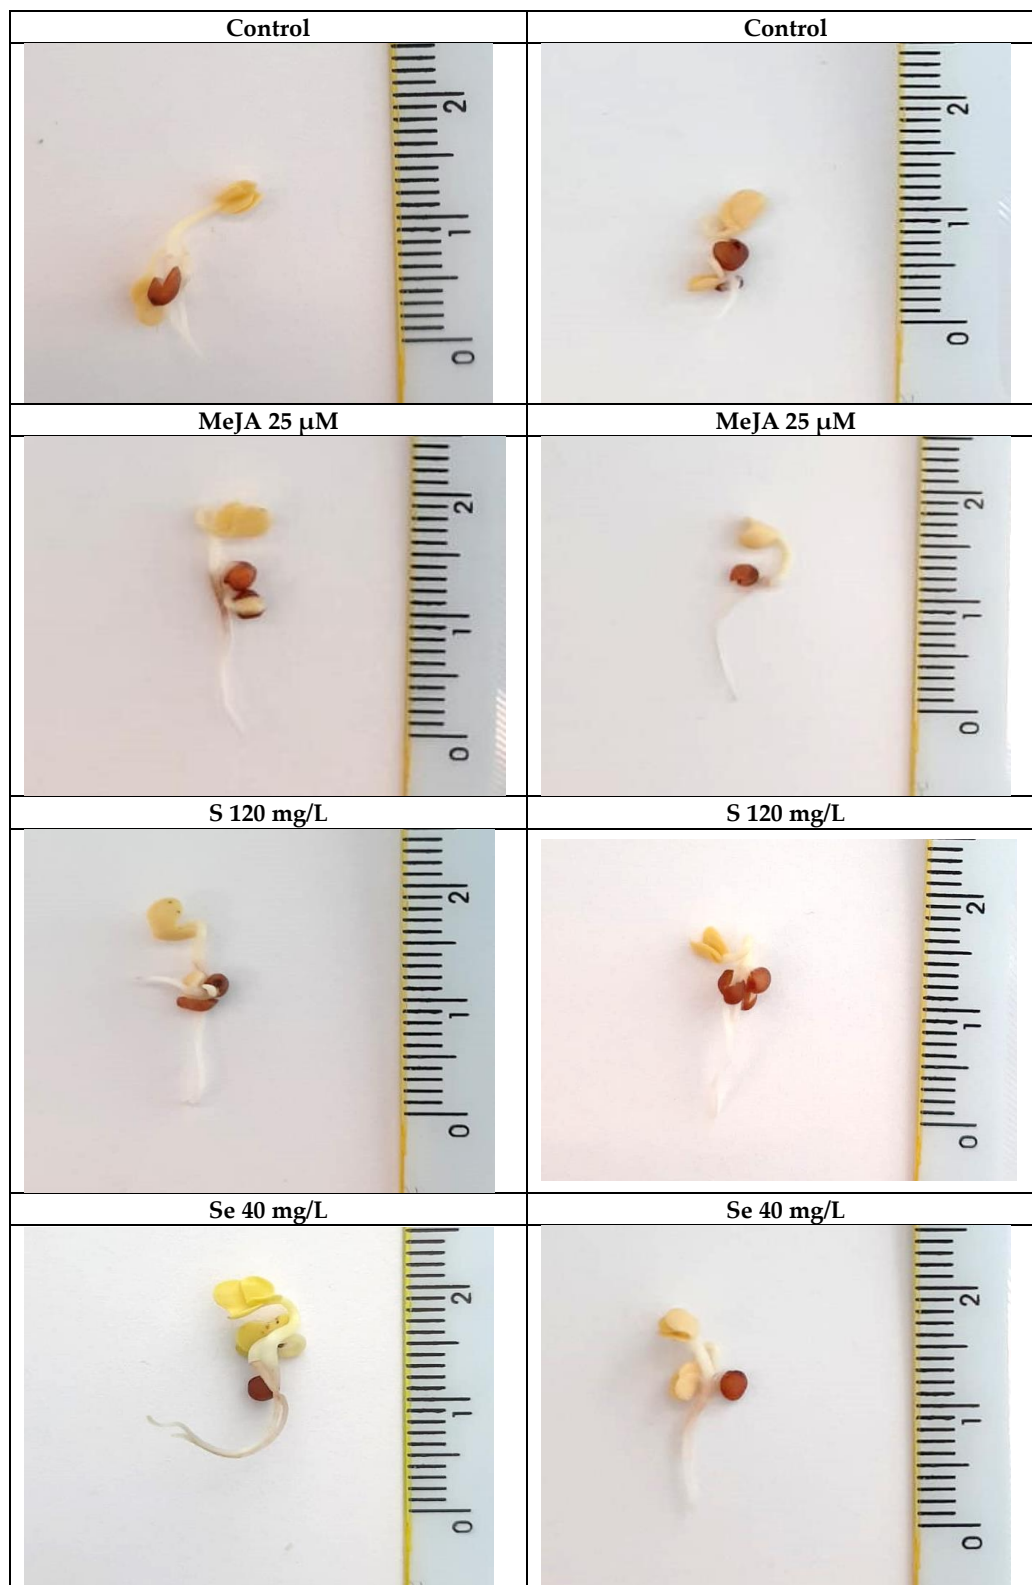

Supplement: s1 [file s1]
